# Supplementary material for: Analysis of Risks and Consequences of Postcatheter Urinary Retention After Primary Total Hip and Knee Arthroplasty
Source: PubMed Central journal article supplement — Arthroplast Today. 2020 Nov 3;6(4):888–93. doi: 10.1016/j.artd.2020.09.003 (PMC7645357; doi:10.1016/j.artd.2020.09.003), 2020-11-03
Supplement: mmc3.pdf [file mmc3.pdf]

# INDIVIDUAL CONFLICT OF INTEREST STATEMENT

## *American Association of Hip and Knee Surgeons*

(Adopted from the American Academy of Orthopaedic Surgeons disclosure statement)

The following form **must be filled out completely and submitted by each author (example, 6 authors, 6 forms).**  
**All items require a response. If there is no relevant disclosure for a given item, enter "None."**

---

**Manuscript Title** Post-Catheter Urinary Retention: Risks and Effects on Renal Function Following Primary Total Hip and Knee Arthroplasty

1. Royalties from a company or supplier (The following conflicts were disclosed)  
None
2. Speakers bureau/paid presentations for a company or supplier (The following conflicts were disclosed)  
Pacira Pharmaceuticals
- 3A. Paid employee for a company or supplier (The following conflicts were disclosed)  
None
- 3B. Paid consultant for a company or supplier (The following conflicts were disclosed)  
DePuy, Orthalign, Pacira Pharmaceuticals, SPR Therapeutics
- 3C. Unpaid consultants for a company or supplier (The following conflicts were disclosed)  
None
4. Stock or stock options in a company or supplier (The following conflicts were disclosed)  
None
5. Research support from a company or supplier as a Principal Investigator (The following conflicts were disclosed)  
Biomup, Conformis, DePuy, Pacira, Reflection Health, Stryker, Zimmer
6. Other financial or material support from a company or supplier (The following conflicts were disclosed)  
None
7. Royalties, financial or material support from publishers (The following conflicts were disclosed)  
None
8. Medical/Orthopaedic publications editorial/governing board (The following conflicts were disclosed)  
Journal of Arthroplasty
9. Board member/committee appointments for a society (The following conflicts were disclosed)  
None

**Each author must sign AND print or type his/her name, date and submit a separate form**

In addition, one BLINDED Conflict of Interest form (no author names used) should be submitted per manuscript with all author disclosures.

Dan Del Gaizo  
Author Name (Print or Type)

  
Author Signature

11/16/19  
Date
